# Supplementary material
Source: PubMed Central journal article supplement (PMC4216214)
Supplement: jm5003843_si_001.pdf [file jm5003843_si_001.pdf]

# Identification of 1-([1-(4-Fluorophenyl)-5-(2-methoxyphenyl)-1H-pyrazol-3-yl]carbonyl) amino) cyclohexane Carboxylic Acid as a Selective Non-peptide Neurotensin Receptor Type 2 Compound

*James B. Thomas,<sup>\*†</sup> Angela M. Giddings,<sup>†</sup> Robert W. Wiethe,<sup>†</sup> Srinivas Olepu,<sup>†</sup> Keith R. Warner,<sup>†</sup> Philippe Sarret,<sup>‡</sup> Louis Gendron,<sup>‡</sup> Yanan Zhang,<sup>†</sup> Scott P. Runyon,<sup>†</sup> and Brian P. Gilmour<sup>†</sup>*

<sup>†</sup>Center for Organic and Medicinal Chemistry, Research Triangle Institute, P. O. Box 12194, Research Triangle Park, North Carolina 27709, United States

<sup>‡</sup>Department of Physiology and Biophysics, Faculty of Medicine and Health Sciences, Université de Sherbrooke, 3001, 12th Ave. North, Sherbrooke, QC, J1H 5N4, Canada

## SUPPORTING INFORMATION

Analysis Appendix ..... S2

Analysis Appendix

| Compd      | formula                                                                              | Calculated |      |       | Found |      |       |
|------------|--------------------------------------------------------------------------------------|------------|------|-------|-------|------|-------|
|            |                                                                                      | C          | H    | N     | C     | H    | N     |
| <b>7b</b>  | C <sub>24</sub> H <sub>24</sub> FN <sub>3</sub> O <sub>4</sub>                       | 65.89      | 5.53 | 9.61  | 65.67 | 5.62 | 9.90  |
| <b>13</b>  | C <sub>32</sub> H <sub>33</sub> N <sub>3</sub> O <sub>3</sub> •Et <sub>2</sub> O     | 74.33      | 7.45 | 7.22  | 74.61 | 7.26 | 6.93  |
| <b>14b</b> | C <sub>29</sub> H <sub>29</sub> ClN <sub>4</sub> O <sub>5</sub> •H <sub>2</sub> O    | 61.43      | 5.51 | 9.88  | 61.73 | 5.42 | 9.83  |
| <b>15b</b> | C <sub>29</sub> H <sub>29</sub> ClN <sub>4</sub> O <sub>5</sub> •H <sub>2</sub> O    | 61.43      | 5.51 | 9.88  | 61.71 | 5.74 | 9.51  |
| <b>16b</b> | C <sub>29</sub> H <sub>29</sub> ClN <sub>4</sub> O <sub>5</sub> •Et <sub>2</sub> O   | 63.61      | 6.31 | 8.99  | 63.87 | 6.22 | 9.31  |
| <b>17b</b> | C <sub>28</sub> H <sub>27</sub> ClN <sub>4</sub> O <sub>4</sub>                      | 64.80      | 5.24 | 10.80 | 64.94 | 5.55 | 11.17 |
| <b>18b</b> | C <sub>27</sub> H <sub>23</sub> ClF <sub>2</sub> N <sub>4</sub> O <sub>3</sub>       | 61.78      | 4.42 | 10.67 | 61.85 | 4.68 | 10.33 |
| <b>19b</b> | C <sub>31</sub> H <sub>33</sub> ClN <sub>4</sub> O <sub>6</sub> •1.5H <sub>2</sub> O | 60.93      | 5.77 | 9.17  | 60.62 | 6.01 | 9.12  |
| <b>20b</b> | C <sub>29</sub> H <sub>29</sub> ClN <sub>4</sub> O <sub>5</sub>                      | 63.44      | 5.32 | 10.20 | 63.52 | 5.39 | 10.15 |
| <b>21b</b> | C <sub>28</sub> H <sub>27</sub> ClN <sub>4</sub> O <sub>5</sub> •H <sub>2</sub> O    | 60.81      | 5.29 | 10.13 | 60.52 | 5.36 | 9.94  |
| <b>22b</b> | C <sub>27</sub> H <sub>25</sub> ClN <sub>4</sub> O <sub>5</sub>                      | 62.25      | 4.84 | 10.75 | 61.89 | 4.98 | 10.73 |
| <b>23b</b> | C <sub>27</sub> H <sub>25</sub> ClN <sub>4</sub> O <sub>4</sub>                      | 64.22      | 4.99 | 11.10 | 64.44 | 5.03 | 10.81 |
| <b>24b</b> | C <sub>30</sub> H <sub>31</sub> N <sub>3</sub> O <sub>5</sub>                        | 70.16      | 6.08 | 8.18  | 70.09 | 6.36 | 7.94  |
| <b>25b</b> | C <sub>29</sub> H <sub>29</sub> N <sub>3</sub> O <sub>4</sub>                        | 72.03      | 6.04 | 8.69  | 71.74 | 6.22 | 8.67  |
| <b>26b</b> | C <sub>29</sub> H <sub>29</sub> N <sub>3</sub> O <sub>5</sub> •H <sub>2</sub> O      | 67.30      | 6.04 | 8.12  | 67.43 | 6.27 | 8.41  |
| <b>27b</b> | C <sub>28</sub> H <sub>27</sub> N <sub>3</sub> O <sub>4</sub>                        | 71.62      | 5.80 | 8.95  | 71.38 | 6.02 | 8.59  |
| <b>28b</b> | C <sub>26</sub> H <sub>28</sub> FN <sub>3</sub> O <sub>5</sub>                       | 64.85      | 5.86 | 8.73  | 64.64 | 5.79 | 8.68  |
| <b>29b</b> | C <sub>25</sub> H <sub>26</sub> FN <sub>3</sub> O <sub>5</sub> •Et <sub>2</sub> O    | 64.31      | 6.70 | 7.76  | 64.13 | 6.76 | 8.02  |
| <b>30</b>  | C <sub>29</sub> H <sub>30</sub> FN <sub>3</sub> O <sub>5</sub>                       | 67.04      | 5.82 | 8.09  | 67.35 | 5.87 | 7.85  |
